# Supplementary material
Source: PubMed Central journal article supplement (PMC5695130)
Supplement: IAI.00640-17_zii012172233s1.pdf [file IAI.00640-17_zii012172233s1.pdf]

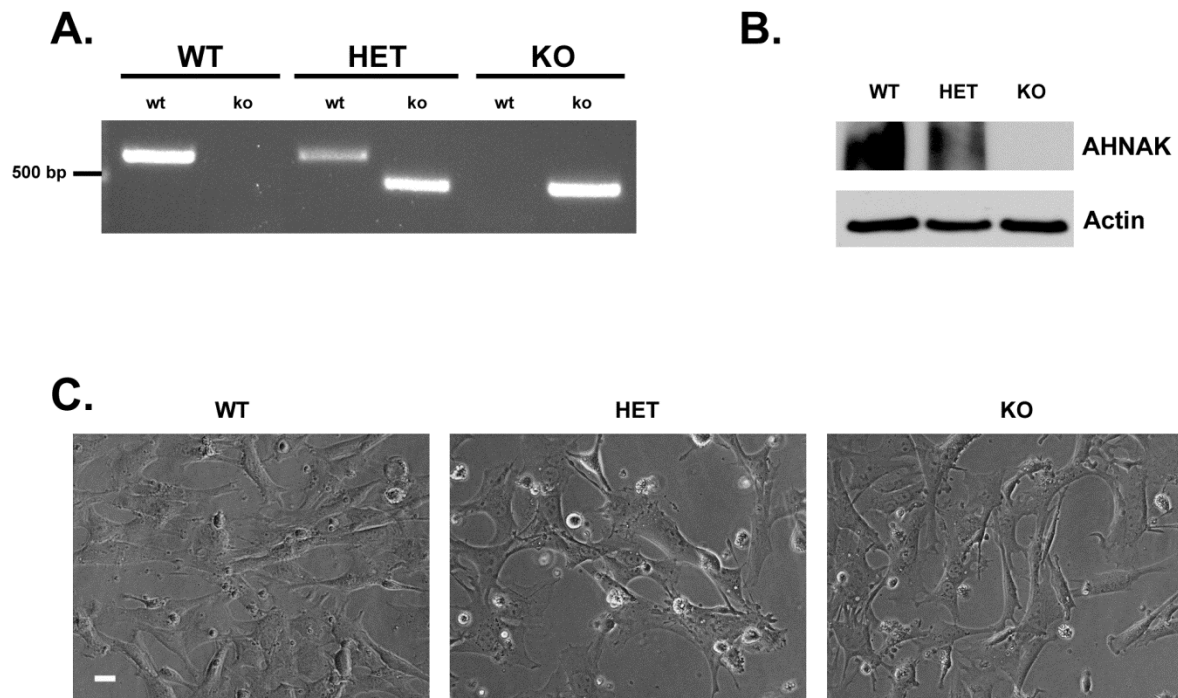

**Supplementary Figure 1. Characterization of *Ahnak* knockout (KO), heterozygous (HET) and wild type (WT) murine embryonic fibroblasts (MEFs).** Isolated MEFs were grown to confluency after a single passage and harvested for PCR-based genotyping, Immunoblot analysis, or imaging. (A) PCR-based genotyping was accomplished using primers capable of discriminating between homozygous full length (wt) and *ahnak* –deficient (ko) alleles. (B) Protein was harvested from whole cultures and concentrated overnight with TCA precipitation. Equal sample volumes were loaded onto a 5% (v/v) SDS-PAGE gel lacking stacking buffer for AHNAK or a 12% (v/v) SDS-PAGE gel with a stacking buffer for  $\beta$ -actin.. Protein levels were visualized with HRP-conjugated secondary antibodies and underwent enhanced chemiluminescence (ECL) development. (C) live cell phase contrast microscopy of cultures at 40X magnification. Bar = 5  $\mu$ M.
